# Supplementary material for: Joint subcarrier, code, and power allocation for parallel multi-radio access in heterogeneous wireless networks
Source: Springer Nature journal article supplement (doi:10.1007/s11432-014-5113-9), 2014-07-15
Supplement: 11432_2014_5113_MOESM1_ESM.pdf [file 11432_2014_5113_MOESM1_ESM.pdf]

中文题目: 异构无线网络并行多接入系统中联合子载波、码字和功率分配算法

关键词: 异构无线网络, 并行多接入, 子载波, 码字, 功率

创新点: 在异构无线网络中, 在理论上证明了并行多接入系统中联合带宽和功率分配可以获得网络分集增益. 针对异构无线网络并行多接入系统中下行传输, 设计一种有效和实际的联合子载波、码字和功率分配算法. 首先, 我们提出通过比较子载波和码字上可以获得的速率, 得到联合子载波、码字和功率的优化模型. 然后提出一种基于门限性质的资源分配算法. 仿真结果显示所提出的算法相比现有的算法可以获得更好的系统性能.
